CORRECTION

# Correction: Selectivity in Genetic Association with Sub-classified Migraine in Women

**Daniel I. Chasman, Verner Anttila, Julie E. Buring, Paul M. Ridker, Markus Schürks, Tobias Kurth, International Headache Genetics Consortium**

Incorrect date for reference [13]:

The date for reference [13] is incorrect. The correct date is 2010, not 2013. The correct reference is: Anttila V, Stefansson H, Kallela M, Todt U, Terwindt GM, et al. (2010) Genome-wide association study of migraine implicates a common susceptibility variant on 8q22.1. *Nat Genet* 42 (10) 869–873.

Missing reference:

A reference is omitted from the fourth sentence of the second paragraph in the Introduction section.

The sentence should read: Recent reports have described a greater number of highly significant common genetic variants for MO than MA in genome-wide analyses, as well as only partial overlap between the sets of identified genes [11–13, Anttila et al., 2013].

The reference is: Anttila V, Winsvold BS, Gormley P, Kurth T, Bettella F, et al. (2013) Genome-wide meta-analysis identifies new susceptibility loci for migraine. *Nat Genet*. 45 (8) 912–917.

All subsequent mentions of reference [13] should cite this new reference instead.

## Reference

1. Chasman DI, Anttila V, Buring JE, Ridker PM, Schürks M, Kurth T, et al. (2014) Selectivity in Genetic Association with Sub-classified Migraine in Women. *PLoS Genet* 10(5): e1004366. doi:[10.1371/journal.pgen.1004366](https://doi.org/10.1371/journal.pgen.1004366) PMID: [24852292](https://pubmed.ncbi.nlm.nih.gov/24852292/)

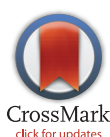

## OPEN ACCESS

**Citation:** Chasman DI, Anttila V, Buring JE, Ridker PM, Schürks M, Kurth T, et al. (2015) Correction: Selectivity in Genetic Association with Sub-classified Migraine in Women. *PLoS Genet* 11(6): e1005330. doi:[10.1371/journal.pgen.1005330](https://doi.org/10.1371/journal.pgen.1005330)

**Published:** June 15, 2015

**Copyright:** © 2015 Chasman et al. This is an open access article distributed under the terms of the [Creative Commons Attribution License](https://creativecommons.org/licenses/by/4.0/), which permits unrestricted use, distribution, and reproduction in any medium, provided the original author and source are credited.
